# Supplementary material for: The structural changes of a bovine casein micelle during temperature change; in situ observation over a wide spatial scale from nano to micrometer
Source: Royal Society of Chemistry journal article supplement (doi:10.1039/d3sm00146f), 2023-01-01
Supplement: d3sm00146f1.pdf [file d3sm00146f1.pdf]

Electronic Supplementary Information

# The Structural Changes of a Bovine Casein Micelle during Temperature Change; In situ Observation over a Wide Spatial Scale from Nano to Micrometer

Hideaki Takagi\*,<sup>1</sup> Tomoki Nakano,<sup>2</sup> Takayoshi Aoki,<sup>3</sup> Morimasa Tanimoto<sup>4,5</sup>

<sup>1</sup> Institute of Materials Structure Science, High Energy Accelerator Research Organization, 1-1 Oho, Tsukuba, Ibaraki, 305-0801, Japan

<sup>2</sup> Research Division, Minami Nippon Dairy Co-op Co., Ltd., 5282, Takagi, Miyakonojyo, Miyazaki, 885-0003, Japan

<sup>3</sup> Professor Emeritus, Kagoshima University, Hoshigamine, Kagoshima, 891-0102, Japan

<sup>4</sup> Professor Emeritus, University of Yamanashi, 4-4-37, Takeda, Kofu, Yamanashi, 400-8510, Japan

<sup>5</sup> Department of Food Sciences, Tokyo Seiei College, 1-4-6, Nishishinkoiwa, Katsushika-Ku, Tokyo, 124-8530, Japan

Table S1. Fraction, molecular weight, chemical formula and electron density of casein proteins.

| Casein        | %    | Molecular weight<br>(g/mol) | Chemical formula                                                                    | Electron density<br>( $e^-/\text{nm}^3$ ) |
|---------------|------|-----------------------------|-------------------------------------------------------------------------------------|-------------------------------------------|
| $\alpha_{s1}$ | 38.2 | 23614                       | $\text{C}_{1035}\text{H}_{1595}\text{N}_{265}\text{O}_{341}\text{S}_5\text{P}_8$    | 437.3                                     |
| $\alpha_{s2}$ | 11   | 25228                       | $\text{C}_{1083}\text{H}_{1718}\text{N}_{287}\text{O}_{371}\text{S}_6\text{P}_{11}$ | 437.5                                     |
| $\beta$       | 39.5 | 23983                       | $\text{C}_{1080}\text{H}_{1697}\text{N}_{268}\text{O}_{325}\text{S}_6\text{P}_5$    | 438.6                                     |
| $\kappa$      | 11.3 | 19003                       | $\text{C}_{850}\text{H}_{1323}\text{N}_{222}\text{O}_{262}\text{S}_4\text{P}_1$     | 438.2                                     |

Table S2. Concentration of lactose,  $\beta$ -Lactoglobulin and  $\alpha$ -Lactalbumin in skim milk used in this study.

|                        | Concentration g/L |
|------------------------|-------------------|
| Lactose                | 47.4              |
| $\beta$ -Lactoglobulin | 4.61              |
| $\alpha$ -Lactalbumin  | 1.02              |

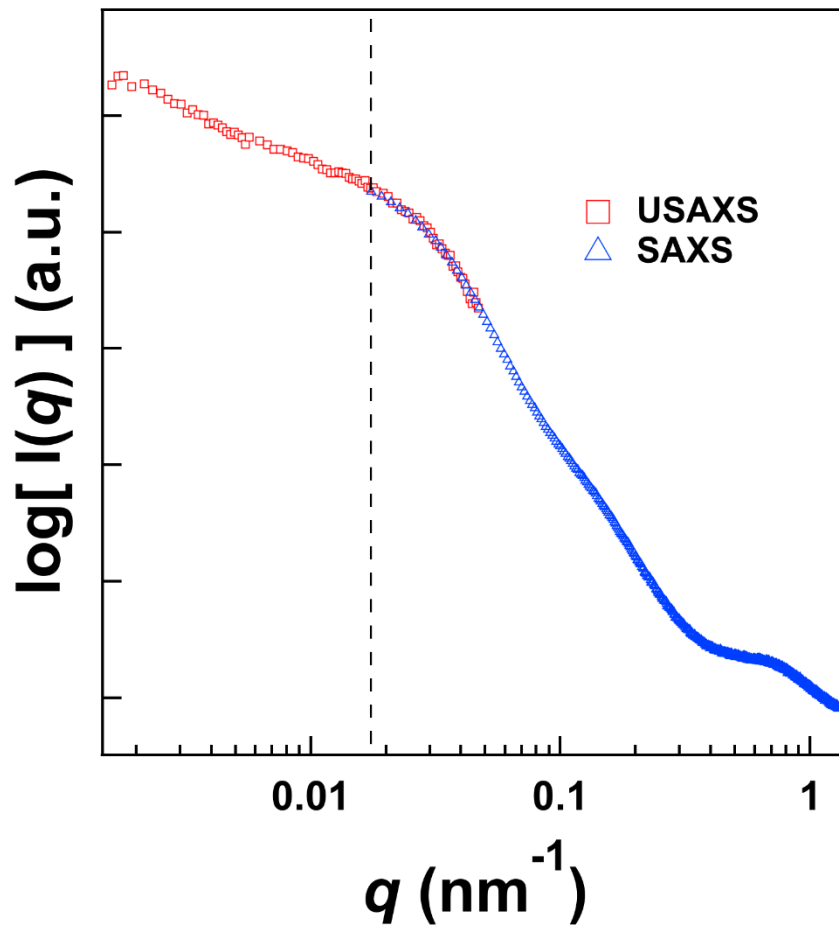

Figure S1. USAXS and SAXS profiles of skim milk obtained at 30 °C. Red squares and blue triangles represent USAXS ( $0.0016 < q < 0.047 \text{ nm}^{-1}$ ) and SAXS ( $0.017 < q < 1.3 \text{ nm}^{-1}$ ) data, respectively. The USAXS data in the range of  $0.017 < q < 0.047 \text{ nm}^{-1}$  overlapped almost completely.

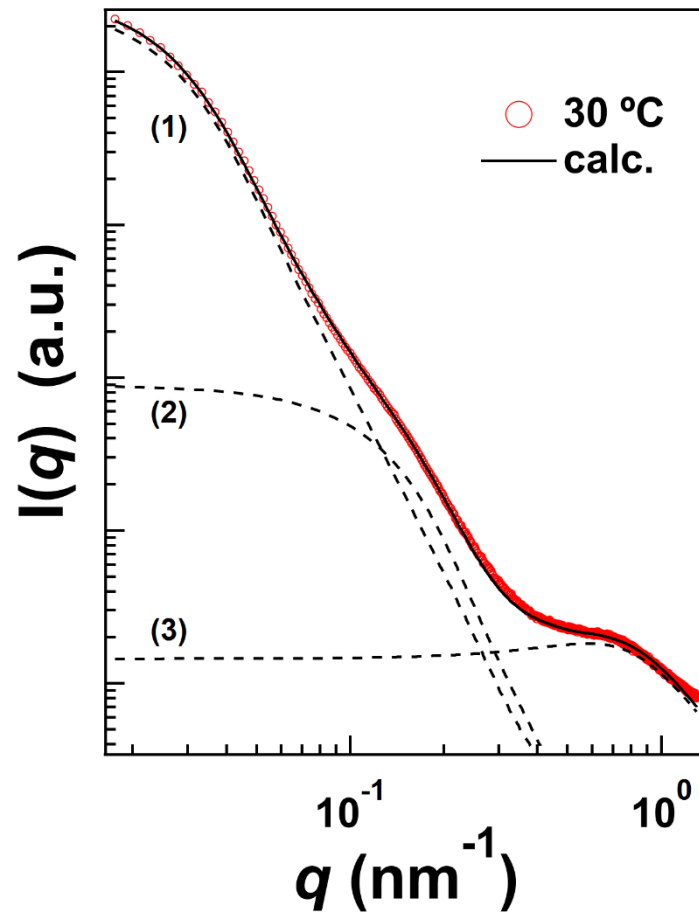

Figure S2. SAXS profile obtained at 30 °C during the heating process. The solid lines represent the curves calculated using eq. (2). The dashed lines (1)–(3) refer to the contribution of the first three terms in eq. (2)
